# Supplementary material for: Association of Glucose-6-Phosphate Dehydrogenase Deficiency With Outcomes in US Veterans With COVID-19
Source: PubMed Central journal article supplement (PMC10061239; doi:10.1001/jamanetworkopen.2023.5626), 2023-03-29
Supplement: jamanetwopen-e235626-s002.pdf [file jamanetwopen-e235626-s002.pdf]

## Data Sharing Statement

Elsa. Association of Glucose-6-Phosphate Dehydrogenase Deficiency With Outcomes in US Veterans With COVID-19. *JAMA Netw Open*. Published March 29, 2023.

doi:10.1001/jamanetworkopen.2023.5626

### Data

**Data available:** No

### Additional Information

**Explanation for why data not available:** Individual patient data from veterans are not available due department of veteran affairs privacy, but raw data from the entire dataset is available in the supplement at at request.
